# Supplementary material
Source: HighWire-hosted journal article supplement (https://erj.ersjournals.com/content/51/2/1701488)
Supplement: inline-supplementary-material-1 [file inline-supplementary-material-1.pdf]

**Appendix: schedule of clinical, laboratory and adherence assessments for rifampin therapy.**

| Actions                                                                                                                                 | Baseline | Month 1                                                                                                                                                                    | Month 2 | Month 3 | Month 4 |
|-----------------------------------------------------------------------------------------------------------------------------------------|----------|----------------------------------------------------------------------------------------------------------------------------------------------------------------------------|---------|---------|---------|
| Medical evaluation                                                                                                                      | ✓        | If needed<br>NOTE: Indicated for clients with liver toxicity, thrombocytopenia and/or signs/symptoms of TB or for clients who require chest x-ray at treatment completion. |         |         |         |
| Clinical assessment                                                                                                                     |          | ✓                                                                                                                                                                          | ✓       | ✓       | ✓       |
| Adherence assessment                                                                                                                    |          | ✓                                                                                                                                                                          | ✓       | ✓       | ✓       |
| Chest x-ray                                                                                                                             | ✓<br>∅   |                                                                                                                                                                            |         |         | **      |
| Weight <sup>§</sup>                                                                                                                     | ✓        | ✓                                                                                                                                                                          | ✓       | ✓       | ✓       |
| AST, Total Bilirubin <sup>Φ</sup> , CBC <sup>Φ</sup><br>(NOTE: Testing of clients under 16 years is done as recommended by TB Services) |          |                                                                                                                                                                            |         |         |         |
| 16 to 34                                                                                                                                | ✓        |                                                                                                                                                                            |         |         |         |
| 35 to 50                                                                                                                                | ✓        | ✓                                                                                                                                                                          |         |         |         |
| > 50                                                                                                                                    | ✓        | ✓                                                                                                                                                                          | ✓       | ✓       | ✓       |
| Any age with risk factors for drug-induced hepatitis <sup>Ψ</sup>                                                                       | ✓        | ✓                                                                                                                                                                          | ✓       | ✓       | ✓       |

∅ A CXR done within the last 6 months may be used for baseline assessment, unless the client is immune compromised, then a CXR within the last 3 months is required.

\*\* Generally only required for clients with TB-related abnormalities noted on their initial chest x-rays.

**Appendix: schedule of clinical, laboratory and adherence assessments for isoniazid therapy.**

| Actions                                                                       | Baseline | Month 1                                                                                                                                                  | Month 2 | Month 3 | Month 4 | Month 5 | Month 6 | Month 7 | Month 8 | Month 9 |
|-------------------------------------------------------------------------------|----------|----------------------------------------------------------------------------------------------------------------------------------------------------------|---------|---------|---------|---------|---------|---------|---------|---------|
| Medical evaluation                                                            | ✓        | If needed<br>NOTE: Indicated for clients with liver toxicity and/or signs/symptoms of TB or for clients who require chest x-ray at treatment completion. |         |         |         |         |         |         |         |         |
| Clinical assessment                                                           |          | ✓                                                                                                                                                        | ✓       | ✓       | ✓       | ✓       | ✓       | ✓       | ✓       | ✓       |
| Adherence assessment                                                          |          | ✓                                                                                                                                                        | ✓       | ✓       | ✓       | ✓       | ✓       | ✓       | ✓       | ✓       |
| Chest x-ray                                                                   | ✓<br>∅   |                                                                                                                                                          |         |         |         |         |         |         |         | **      |
| Weight <sup>§</sup>                                                           | ✓        | ✓                                                                                                                                                        | ✓       | ✓       | ✓       | ✓       | ✓       | ✓       | ✓       | ✓       |
| AST (NOTE: Testing of clients under 16 is done as recommended by TB Services) |          |                                                                                                                                                          |         |         |         |         |         |         |         |         |
| 16 to 34                                                                      | ✓        |                                                                                                                                                          |         |         |         |         |         |         |         |         |
| 35 to 50                                                                      | ✓        | ✓                                                                                                                                                        |         |         |         |         |         |         |         |         |
| > 50                                                                          | ✓        | ✓                                                                                                                                                        | ✓       | ✓       | ✓       | ✓       | ✓       | ✓       | ✓       | ✓       |
| Any age with risk factors for drug-induced hepatitis <sup>Ψ</sup>             | ✓        | ✓                                                                                                                                                        | ✓       | ✓       | ✓       | ✓       | ✓       | ✓       | ✓       | ✓       |

\*\* Generally only required for clients with TB-related abnormalities noted on their initial chest x-rays.

∅ A CXR done within the last 6 months may be used for baseline assessment, unless the client is immune compromised, then a CXR within the last 3 months is required.

Supplementary Appendix:

Comparison of participants completing therapy versus non-completion

| Variable                                | Completed treatment | Did not complete treatment | p-value |
|-----------------------------------------|---------------------|----------------------------|---------|
| Gender                                  | <b>n=289</b>        | <b>n=69</b>                | 0.754   |
| Female                                  | 156 (54.0)          | 40 (58.0)                  |         |
| Male                                    | 132 (45.7)          | 29 (42.0)                  |         |
| Transgender                             | 1 (0.3)             | 0                          |         |
| Median age in years (IQR)               | 43 (34 - 52)        | 43 (33 - 51)               | 0.990   |
| Alcohol use                             | <b>n=269</b>        | <b>n=66</b>                | 0.746   |
| None                                    | 158 (58.7)          | 39 (59.0)                  |         |
| 1-2 times monthly                       | 84 (31.2)           | 18 (27.3)                  |         |
| 2-3 times weekly                        | 22 (8.2)            | 8 (12.1)                   |         |
| Daily                                   | 5 (1.9)             | 1 (1.5)                    |         |
| Recreational drug use                   | <b>n=261</b>        | <b>n=66</b>                | 0.672   |
| None                                    | 251 (96.2)          | 65 (98.5)                  |         |
| 1-2 times monthly                       | 4 (1.5)             | 1 (1.5)                    |         |
| 2-3 times weekly                        | 3 (1.1)             | 0                          |         |
| Daily                                   | 3 (1.1)             | 0                          |         |
| Highest level of education attained     | <b>n=269</b>        | <b>n=66</b>                | 0.431   |
| No formal education                     | 2 (0.7)             | 2 (3.0)                    |         |
| Elementary or junior high school        | 8 (3.0)             | 1 (1.5)                    |         |
| High school                             | 46 (17.1)           | 14 (21.2)                  |         |
| College/trade school                    | 102 (37.9)          | 26 (39.4)                  |         |
| University                              | 111 (41.3)          | 23 (34.8)                  |         |
| Average annual income, Canadian dollars | <b>n=232</b>        | <b>n=53</b>                | 0.836   |
| < \$10,000                              | 48 (20.7)           | 10 (18.9)                  |         |
| \$10,000-\$49,999                       | 129 (55.6)          | 33 (62.3)                  |         |
| \$50,000-\$99,999                       | 49 (21.1)           | 9 (17.0)                   |         |
| > \$100,000                             | 6 (2.6)             | 1 (1.9)                    |         |
| Region of birth                         | <b>n=286</b>        | <b>n=69</b>                | 0.838   |
| Southeast Asia & Oceania                | 101 (35.3)          | 28 (40.6)                  |         |
| South Asia & the Middle East            | 62 (21.7)           | 11 (15.9)                  |         |
| Canada                                  | 52 (18.2)           | 9 (13.0)                   |         |
| Eastern Asia                            | 40 (14.0)           | 12 (17.4)                  |         |
| Africa                                  | 18 (6.3)            | 3 (4.3)                    |         |
| Europe                                  | 6 (2.1)             | 3 (4.3)                    |         |
| Central America                         | 4 (1.4)             | 2 (2.9)                    |         |
| USA                                     | 3 (1.0)             | 1 (1.4)                    |         |
| Treatment regimen                       | <b>n=289</b>        | <b>n=69</b>                | 0.300   |
| 9-INH                                   | 195 (67.5)          | 51 (73.9)                  |         |
| 4-RIF                                   | 94 (32.5)           | 18 (26.1)                  |         |
